# Supplementary material for: Viral ADP-ribosyltransferases attach RNA chains to host proteins
Source: Research Square preprint supplement (doi:10.21203/rs.3.rs-590309/v1), 2021-06-16
Supplement: Supplementary file 1 [file d824f016343cf32c6d8545cf.docx]

SUPPLEMENTARY INFORMATION

**Viral ADP-ribosyltransferases attach RNA chains to host proteins**

Katharina Höfer1,2* +, Maik Schauerte1,2 + Julia Grawenhoff1, Alexander Wulf3, Luisa M. Welp3, Franziska A. Billau1, Henning Urlaub3,4 & Andres Jäschke1*

1 Institute of Pharmacy and Molecular Biotechnology (IPMB), Heidelberg University, 69120 Heidelberg, Germany

2 Max Planck Institute for Terrestrial Microbiology, 35043 Marburg, Germany.

3 Max Planck Institute for Biophysical Chemistry, 37077 Göttingen, Germany.

4 Institute of Clinical Chemistry, University Medical Center, 37075 Göttingen, Germany.

+ These authors contributed equally to this work.


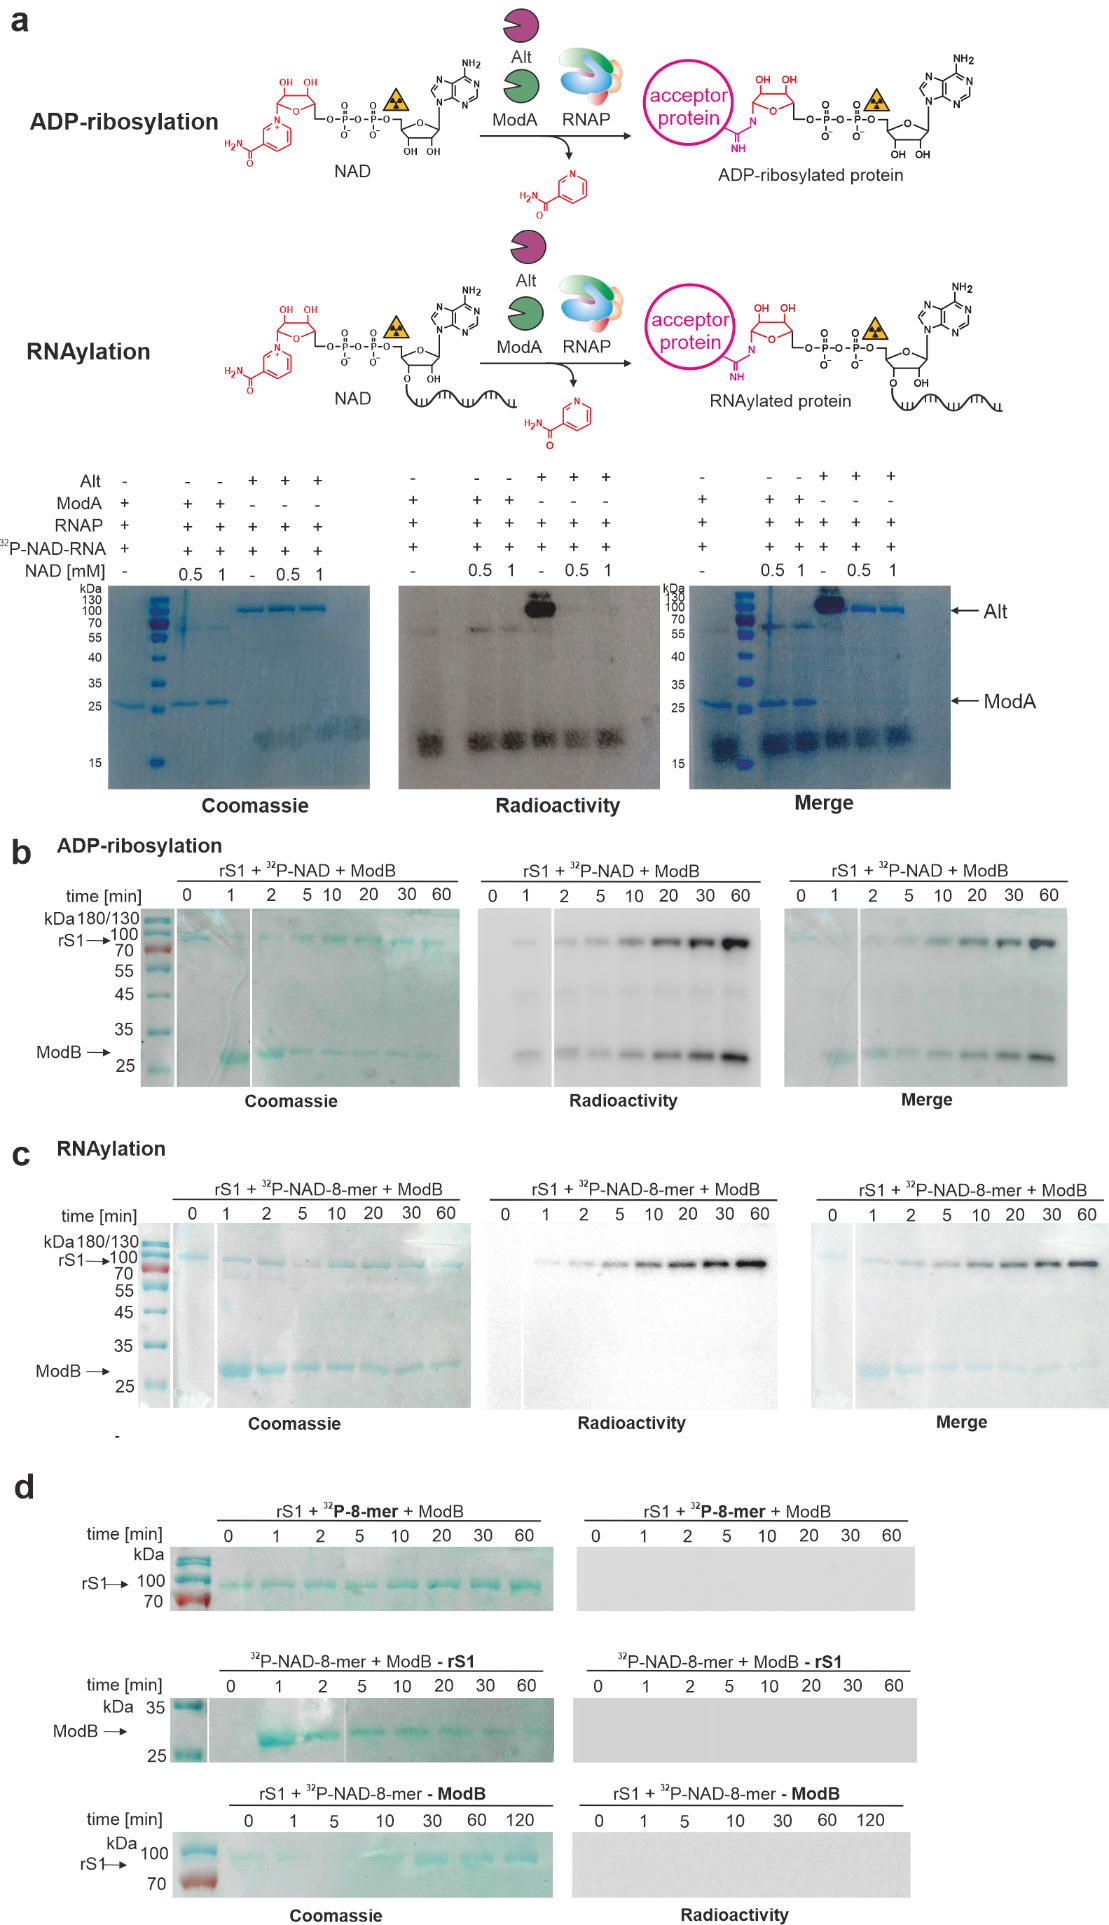


**Extended Data Fig. 1:** ADP-ribosylation and RNAylation by T4 ARTs. **a**, Functional characterisation of the ARTs Alt and ModA. Self- and target modification by Alt using NAD or NAD-RNA analysed by SDS-PAGE and autoradiography. **b**, Time course of the ADP-ribosylation of rS1 by ModB and **c**,Time course of the RNAylation of rS1 by ModB analysed by SDS-PAGE. **d,** Negative controls for RNAylation of rS1 with ModB. RNAylation assay was performed in the presence of 32P-RNA, in the absence of rS1 (- rS1) or ModB (-ModB).


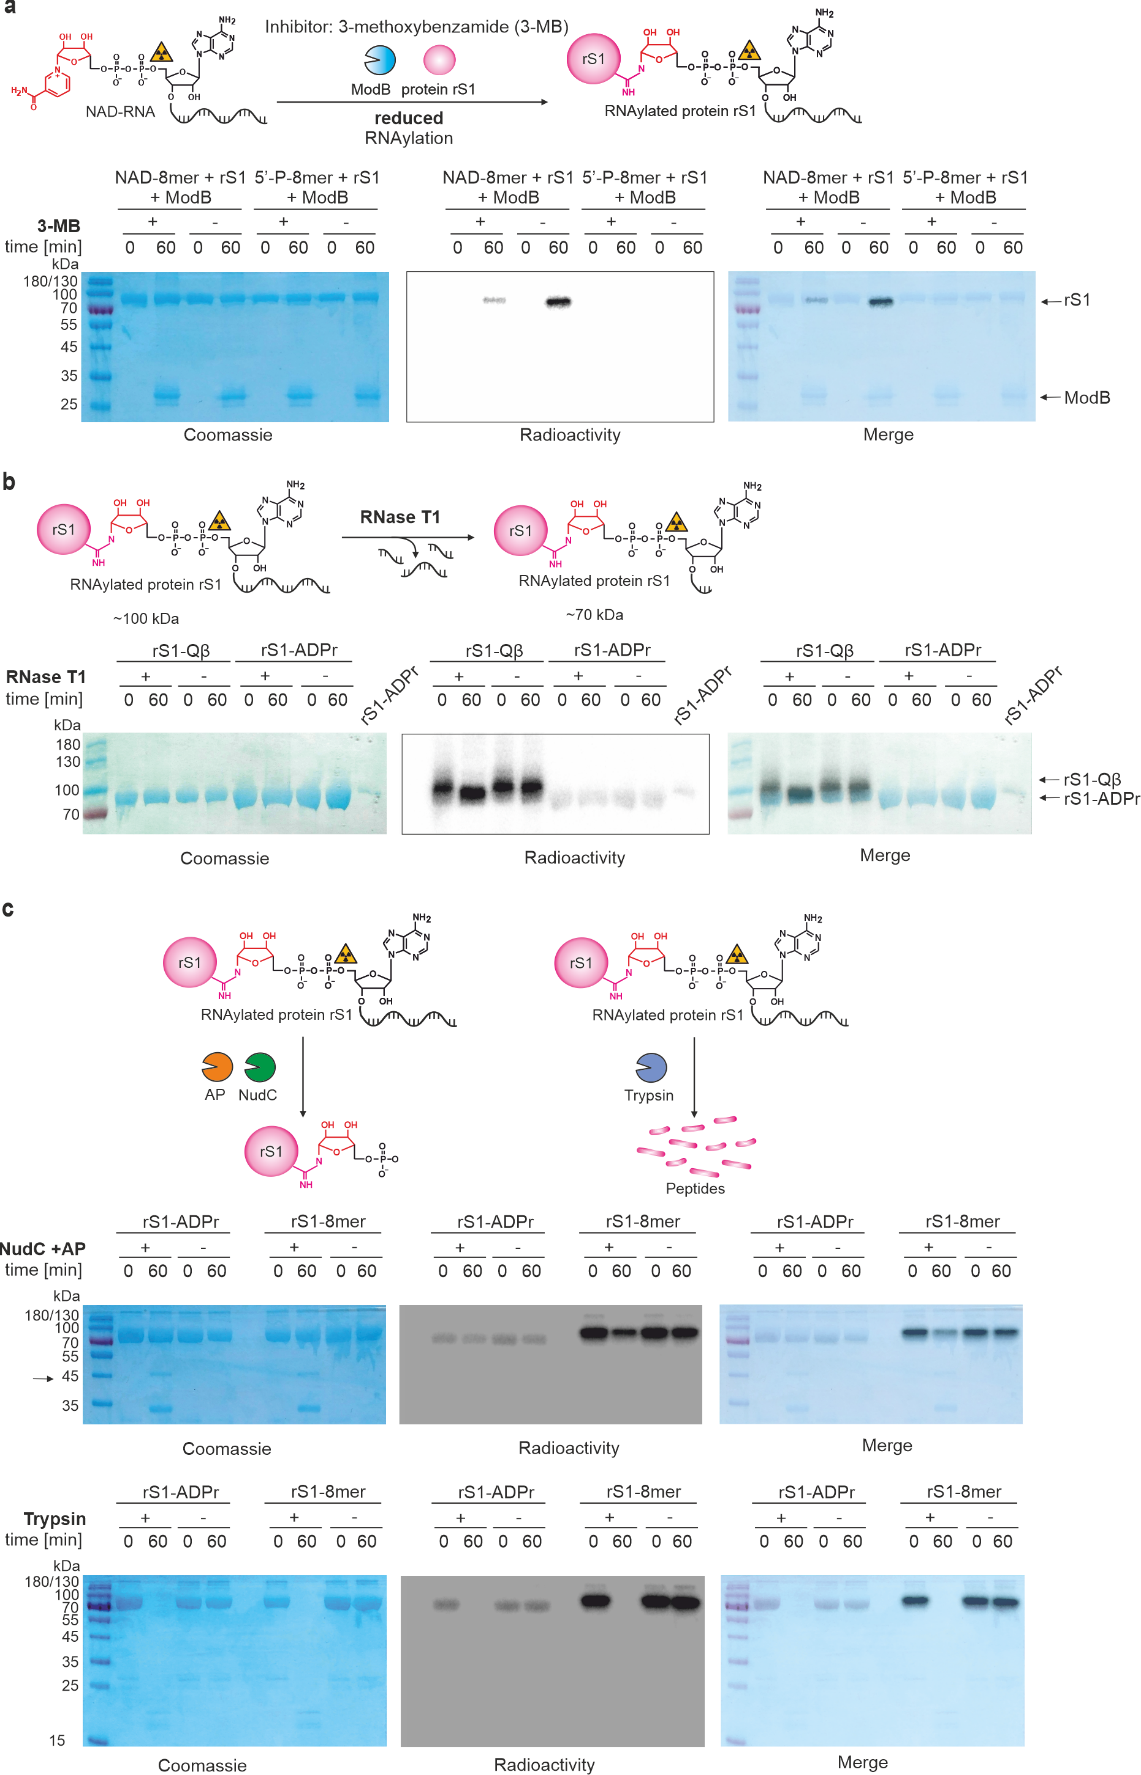


**Extended Data Fig. 2: Characterisation of the RNAylation of protein rS1 by ModB. a**,Inhibition of *in vitro* RNAylation of protein rS1 by ModB via ART inhibitor 3-methoxybenzamide (3-MB). Reactions were performed with 32P-NAD-RNA 8-mer (32P-NAD-8-mer) as well as 32P-RNA 8-mer (negative control). **b**,*in vitro* digest of RNAylated and ADP-ribosylated protein rS1 by RNase T1. Reactions performed in the absence of RNase T1 (-) serve as negative controls. Protein rS1 ADP-ribosylated in the presence of 32P-NAD applied as reference (S1-ADPr) **c**,*in vitro* treatment of ADP-ribosylated and RNAylated protein rS1 with NudC (marked with an arrow) and alkaline phosphatase (AP) and tryptic digest of ADP-ribosylated and RNAylated protein rS1. All samples were analysed by 12 % SDS-PAGE. Left panel: Coomassie-stained gel, middle panel: autoradiography scan, right panel: merge of Coomassie stain and autoradiography scan.


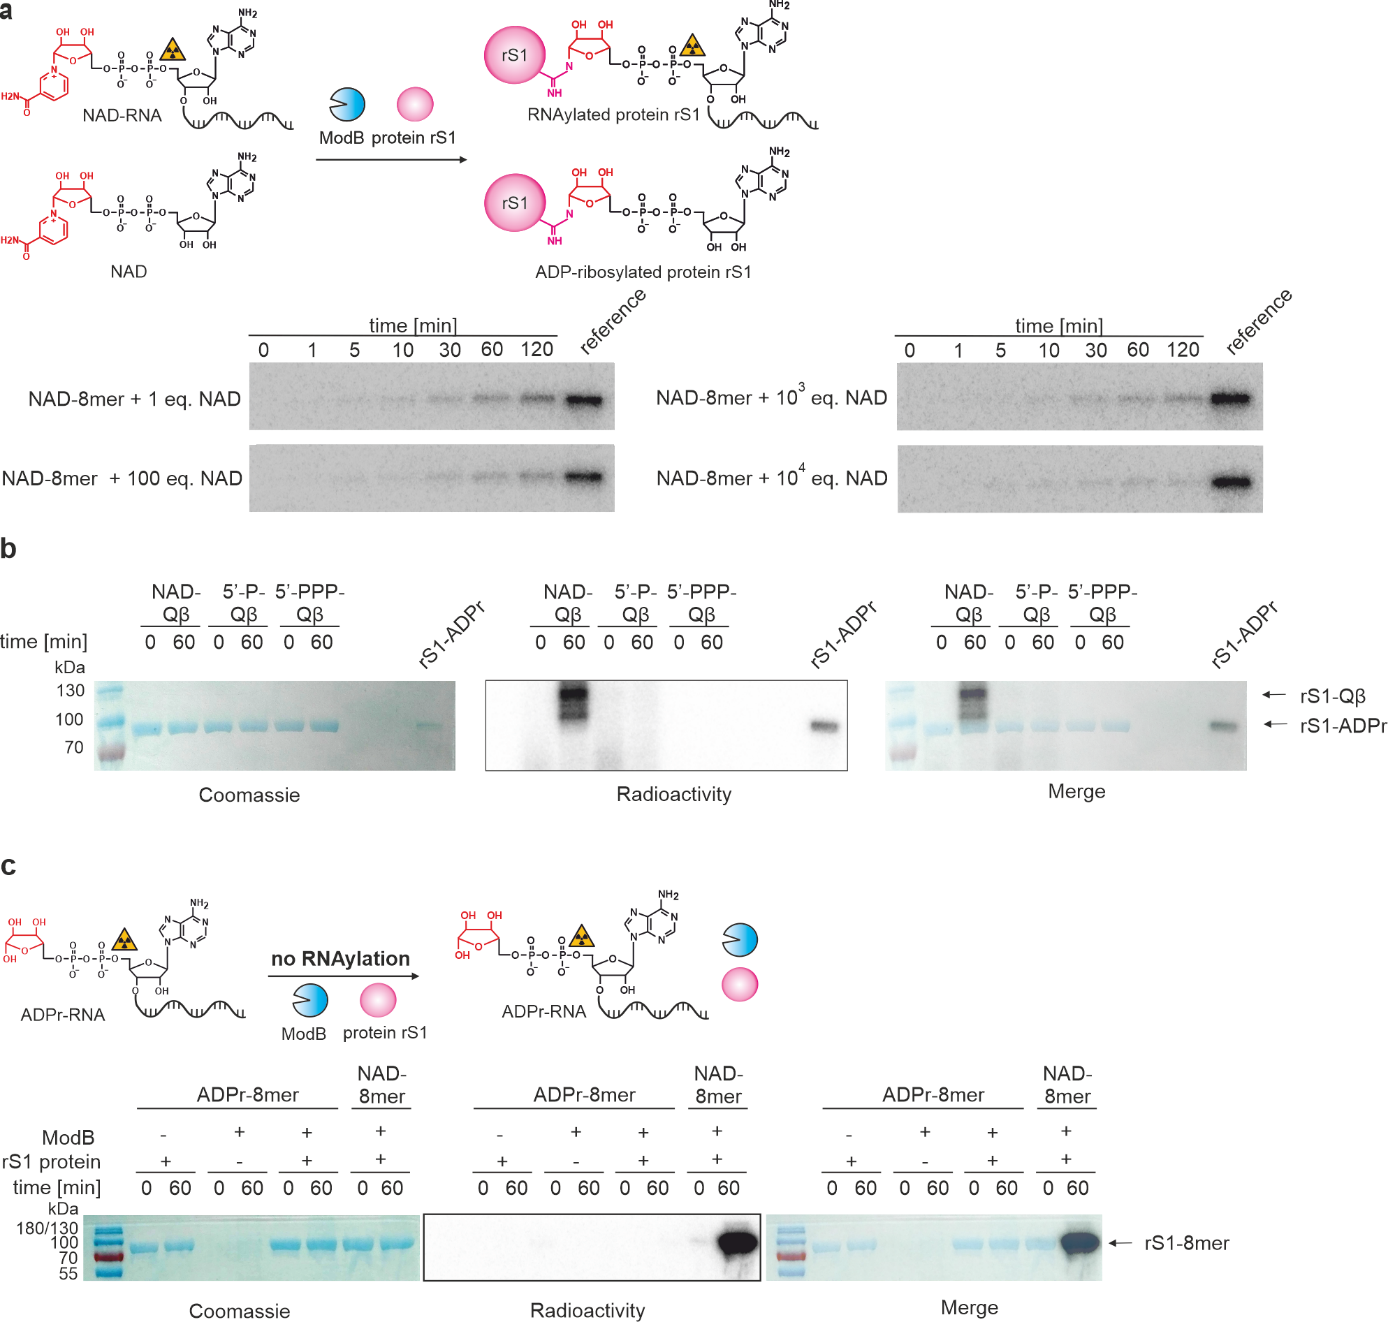


**Extended Data Fig. 3: Characterisation of the specificity of ModB for NAD-RNA as substrate.** **a**, Competition experiments using 32P-NAD-RNA and an excess of unlabelled NAD revealed a preference of ModB for the former (compare Fig. 2c,d). ADPr-rS1 serves as a reference. **b**, Analysis of RNAylation dependency on the presence of a 5’-NAD-cap of the RNA. 10 % SDS-PAGE analysis of *in vitro* RNAylation of the protein rS1 by ModB in the presence of either 5’-NAD- (NAD-32P-Qβ), 5’-monophosphate- (5’-P32-Qβ) or 5’-triphosphate-Qβ-RNA (5’-P32PP-Qβ). **c**, Characterisation of ADPr-RNA as a substrate for ModB. As positive control, NAD-8mer was applied. All reactions were analysed by 12 % SDS-PAGE. Left panel: Coomassie-stained gel, middle panel: autoradiography scan, right panel: merge of Coomassie stain and autoradiography scan.


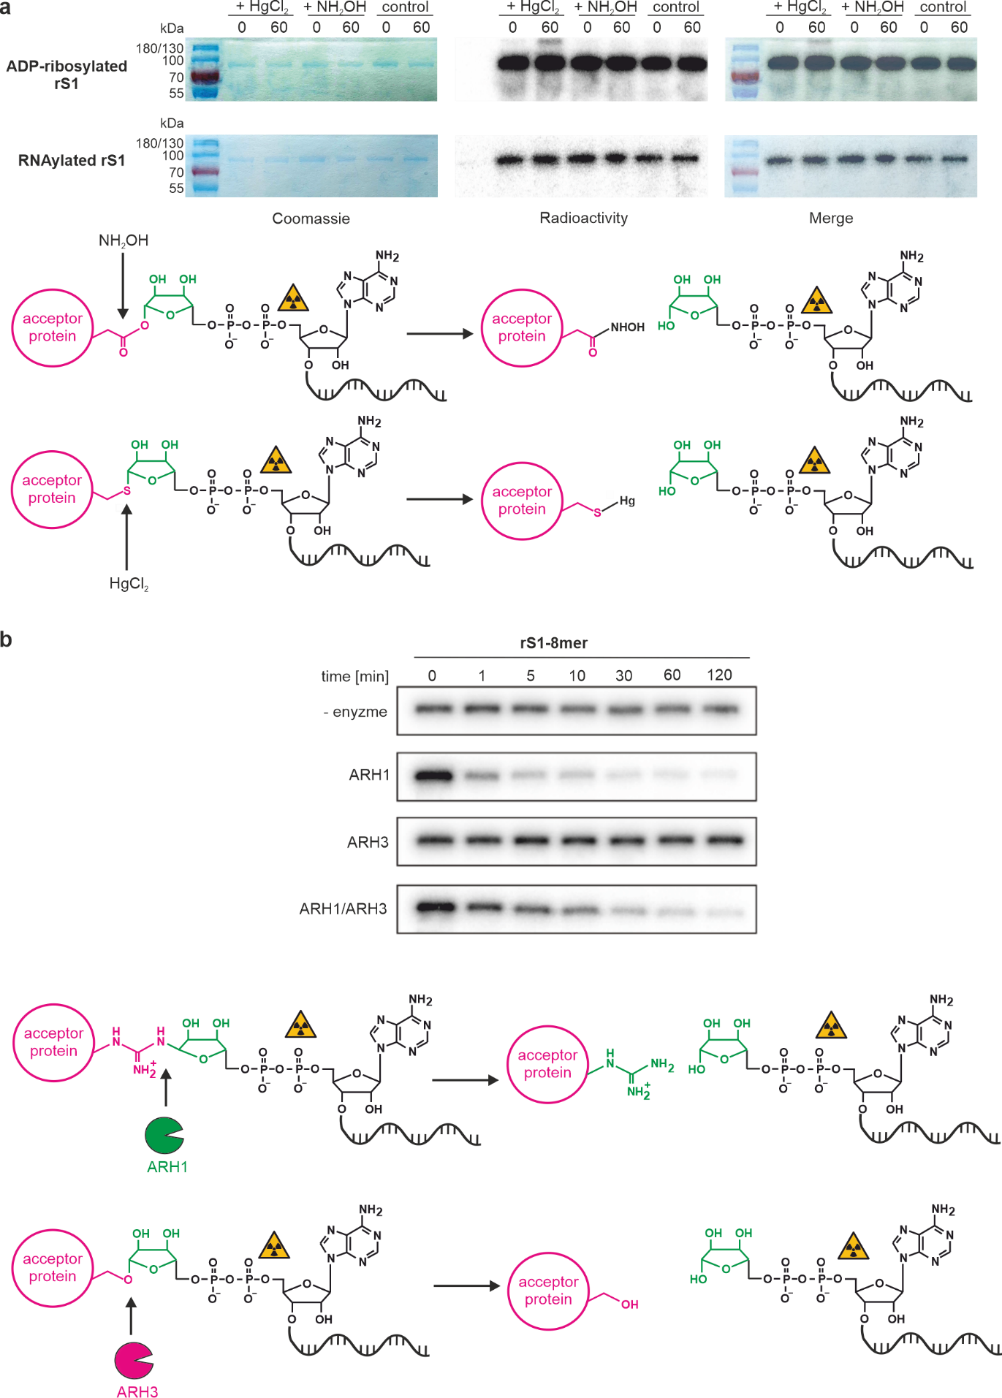


**Extended Data Fig. 4: Specific removal of the RNAylation using chemical and enzymatic treatments. a,** Different ADP-ribose-protein linkages have been shown to be either stable or instable in the presence of HgCl2 and neutral hydroxylamine, which represents a relatively straightforward and fast approach to identify ADP-ribosylation sites. Treatment with hydroxylamine hydrolyses linkages between glutamate and aspartate and ADP-ribose. HgCl2 specifically cleaves thiol-glycosidic bonds. ADP-ribosylated and RNAylated protein rS1 were treated with hydroxylamine or HgCl2. The removal of ADPr or RNA would result in a decrease of the radioactive signal of protein rS1. All samples were analysed by 12 % SDS-PAGE. A decrease of the radioactive signal in comparison to the control (untreated) was not determined. **b**,*in vitro* kinetics of RNAylated protein rS1 in the presence of ARH1 or ARH3 analysed by 12 % SDS-PAGE.


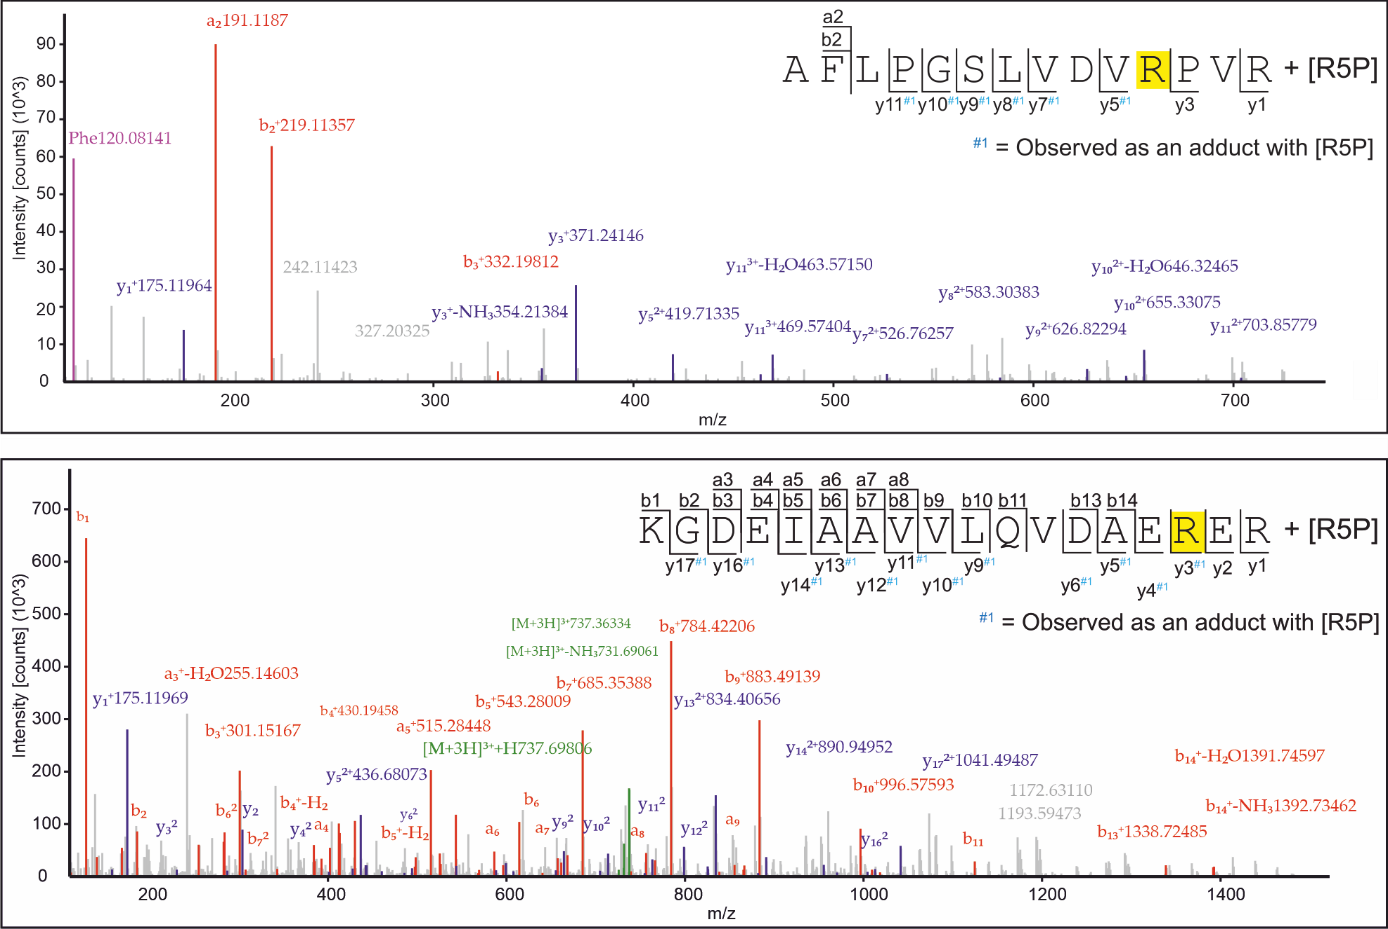


**Extended Data Fig. 5: LC-MS2 spectra of rS1 peptides harboring a peptide ribose-5-phosphate.** LC-MS2 spectra of rS1 peptides harboring a peptide ribose-5-phosphate (R5P) modification at R139 and R426 from *in vivo* experiments. Sufficient peptide sequence coverage of manually validated spectra reveals solely arginine as the modified amino acid *in vivo*. Whilst ADPr escaped LC-MS detection, we identified ribose-5-phosphate (R5P), m/z = 212.0086 Th, as a shorter fragment of ADPr reliably and unambiguously. R5P-linked arginine residues are boxed in yellow.
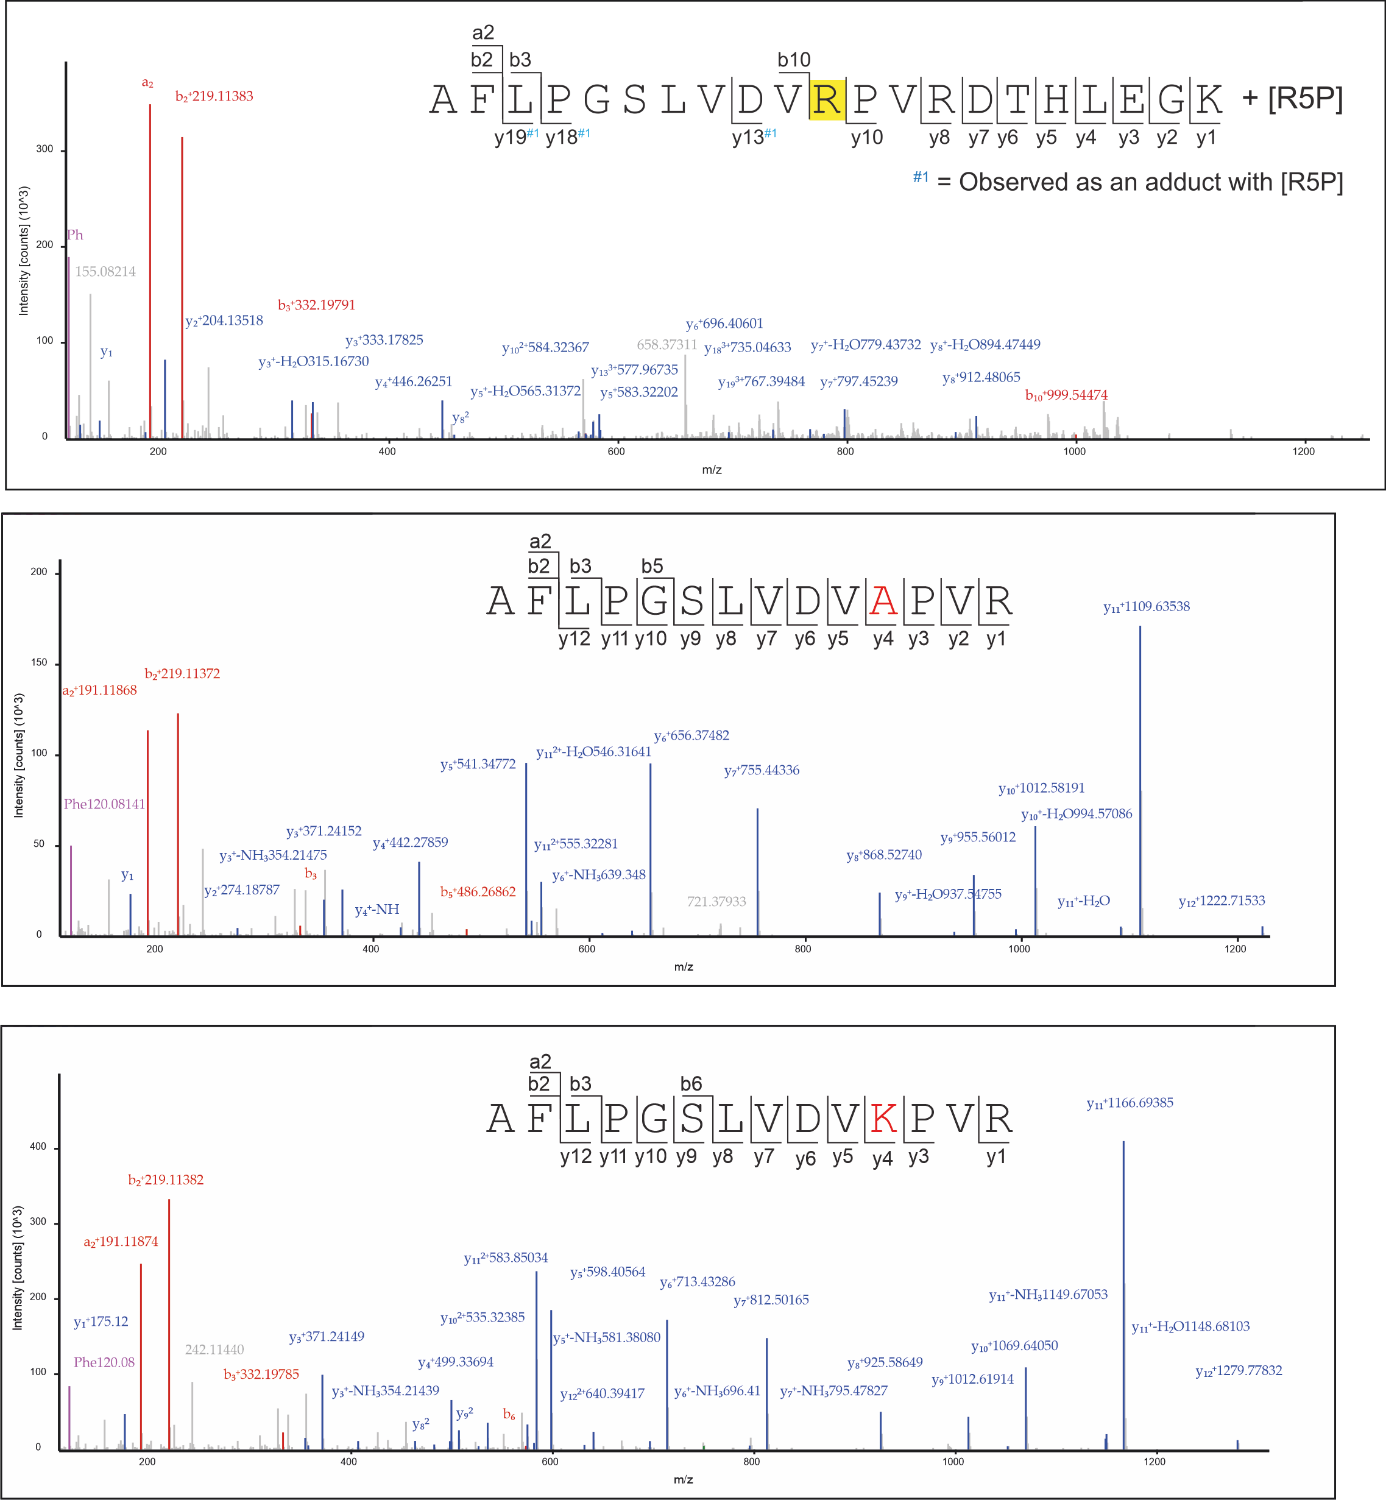


**Extended Data Fig. 6: Characterisation of ADP-ribosylation and RNAylation of R139 of rS1 in vivo.**

Peptide AFLPGSLVDVRPVRTHLEGK isolated from *in vivo* samples carries a R5P modification at R139 as indicated by a yellow box. Even though the peptide is longer due to a missed cleavage at R142, the peptide sequence and modification site was determined reliably. Peptide AFLPGSLVDVAPVRTHLEGK identified from an rS1 R139A or R139K mutant does not carry the R5P modification at position 139.


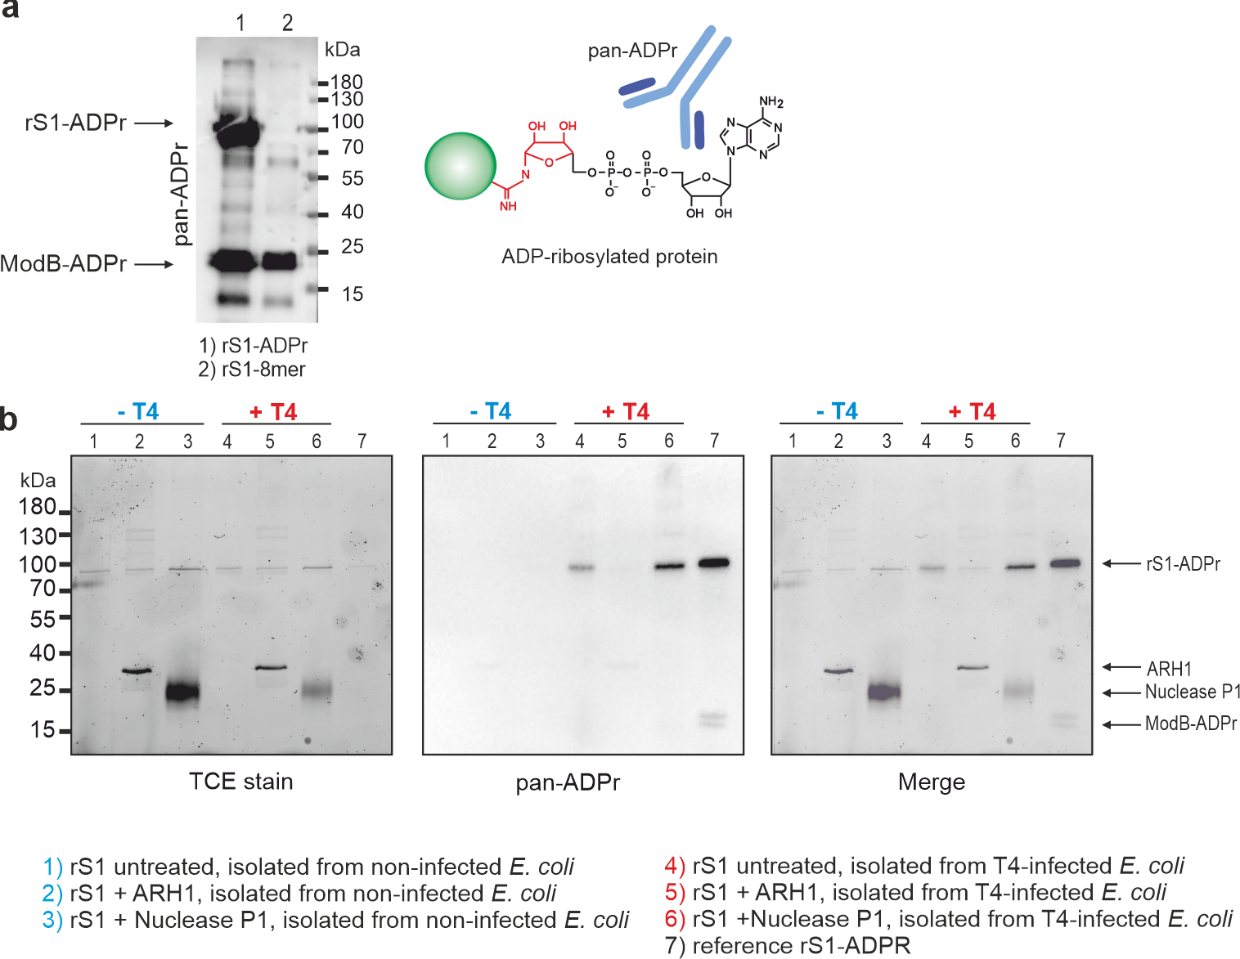


**Extended Data Fig. 7: *In vivo* characterisation of ADP-ribosylation and RNAylation by Western blot analysis. a**, Analysis of the substrate specificity of the pan-ADPr antibody. *In vitro* prepared ADP-ribosylated or RNAylated protein rS1 was applied to evaluate the specificity of the antibody. **b**,Quantification of RNAylation using the combination of nuclease P1 digest and detection of protein-linked ADP-ribose by Western blot. Visualisation of protein load by TCE stain. Removal of the ADP-ribose signal by ARH1 treatment. The corresponding bar chart is shown in Fig.4.


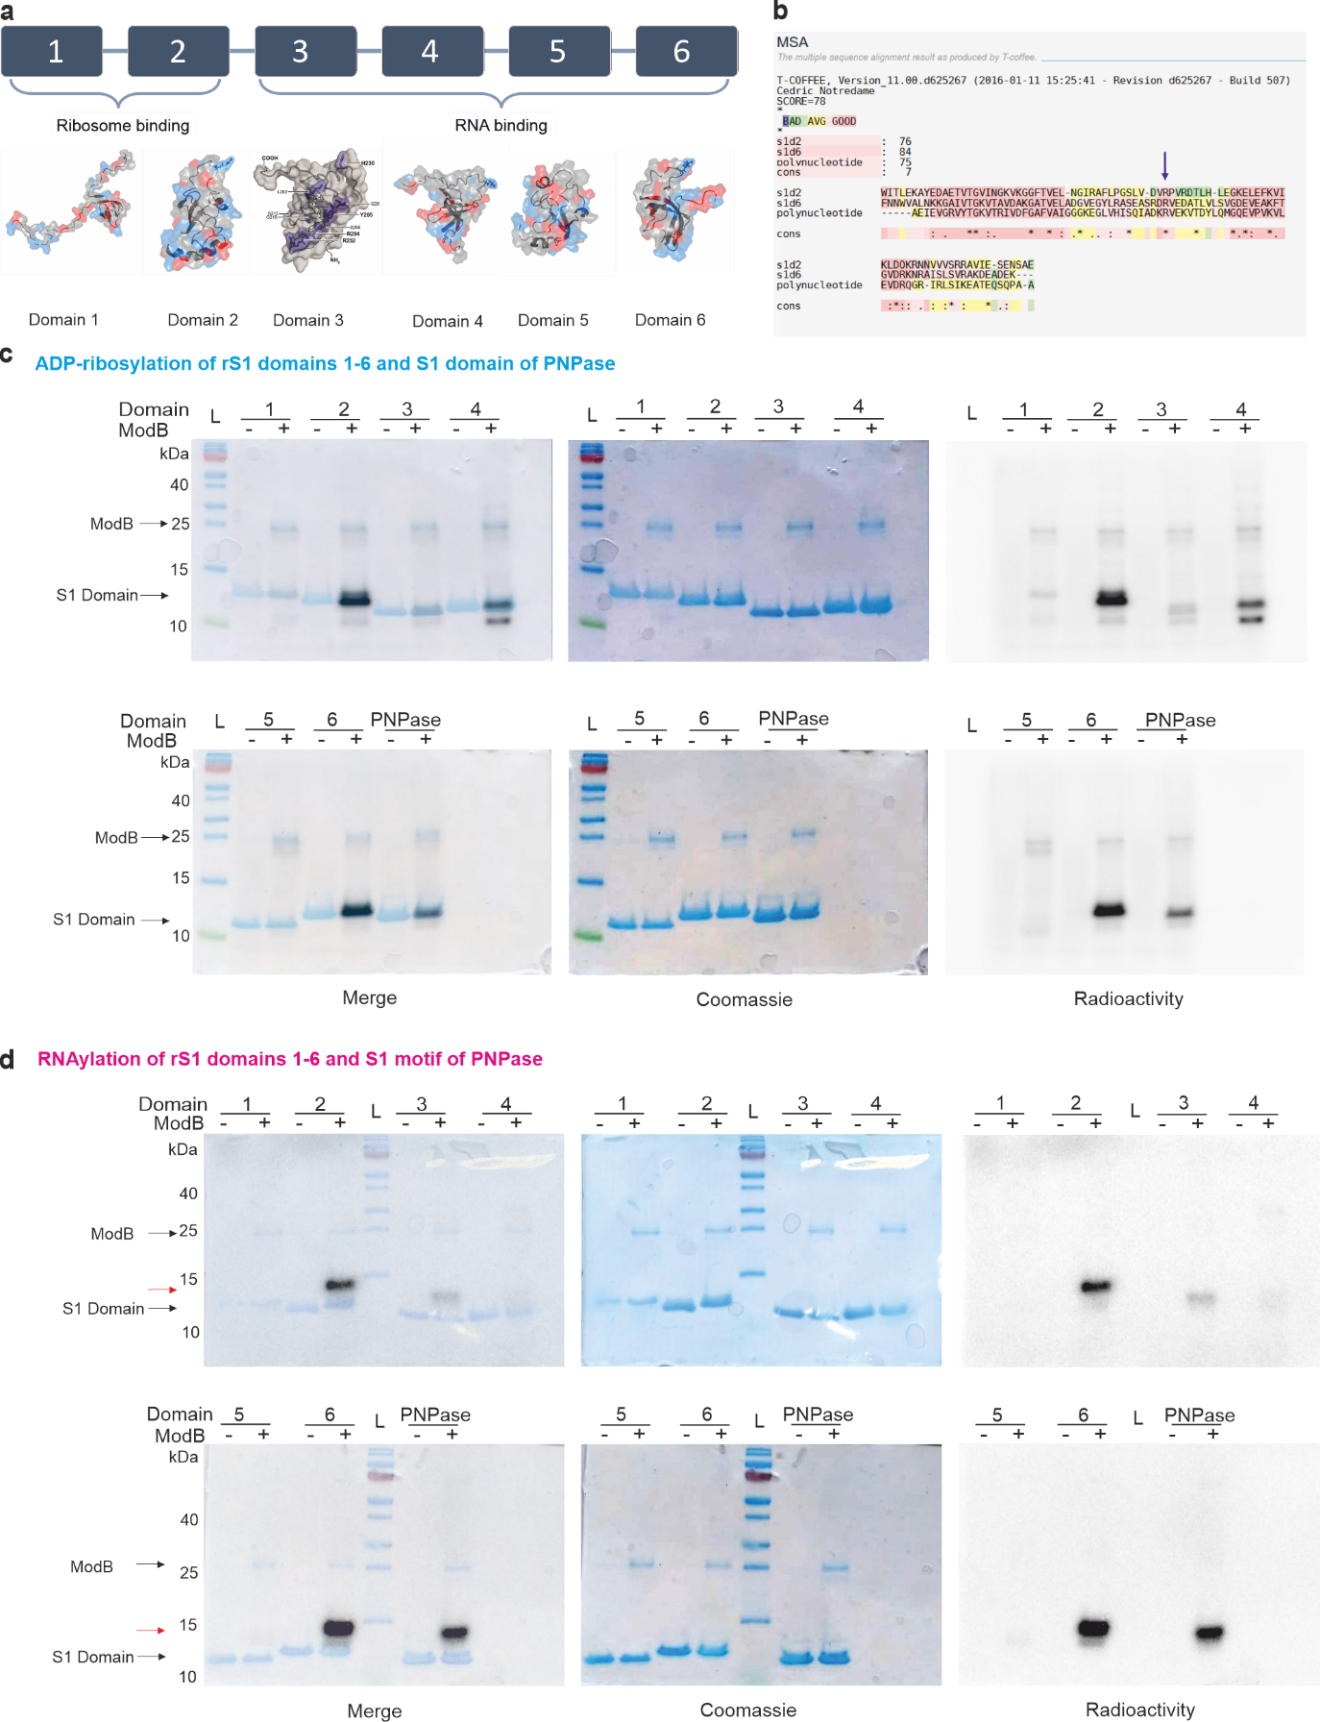


**Extended Data Fig. 8: ADP-ribosylation and RNAylation of rS1 domains D1 – D6 and S1 motif of PNPase by ModB *in vitro*. a**,Schematic illustration of the rS1-motifs of rS1, the crystal structures (PDB) of domains 1 (2MFI), 2 (2MFL), 4 (2KHI), 5 (5XQ5) and 6 (2KHJ) as well as an NMR structure of domain 3 1. **b,** Alignment of D2 and D6 of rS1 as well as of the S1 domain of PNPase using T-coffee expresso 2.R139 of D2 is highlighted with an arrow. **c**, ADP-ribosylation and **d**, RNAylation experiments were performed in triplicates and analysed by 16 % Tricine SDS-PAGE, (L= Ladder). ModB and S1 domains are marked with black arrows. RNAylated rS1 domains, characterised by a significant shift compared to the non-modified proteins, are highlighted with red arrows.  n = 2 of biologically independent replicates. Reactions were performed using 32P-NAD or 32P-NAD-RNA 8-mer as a substrate for ModB.


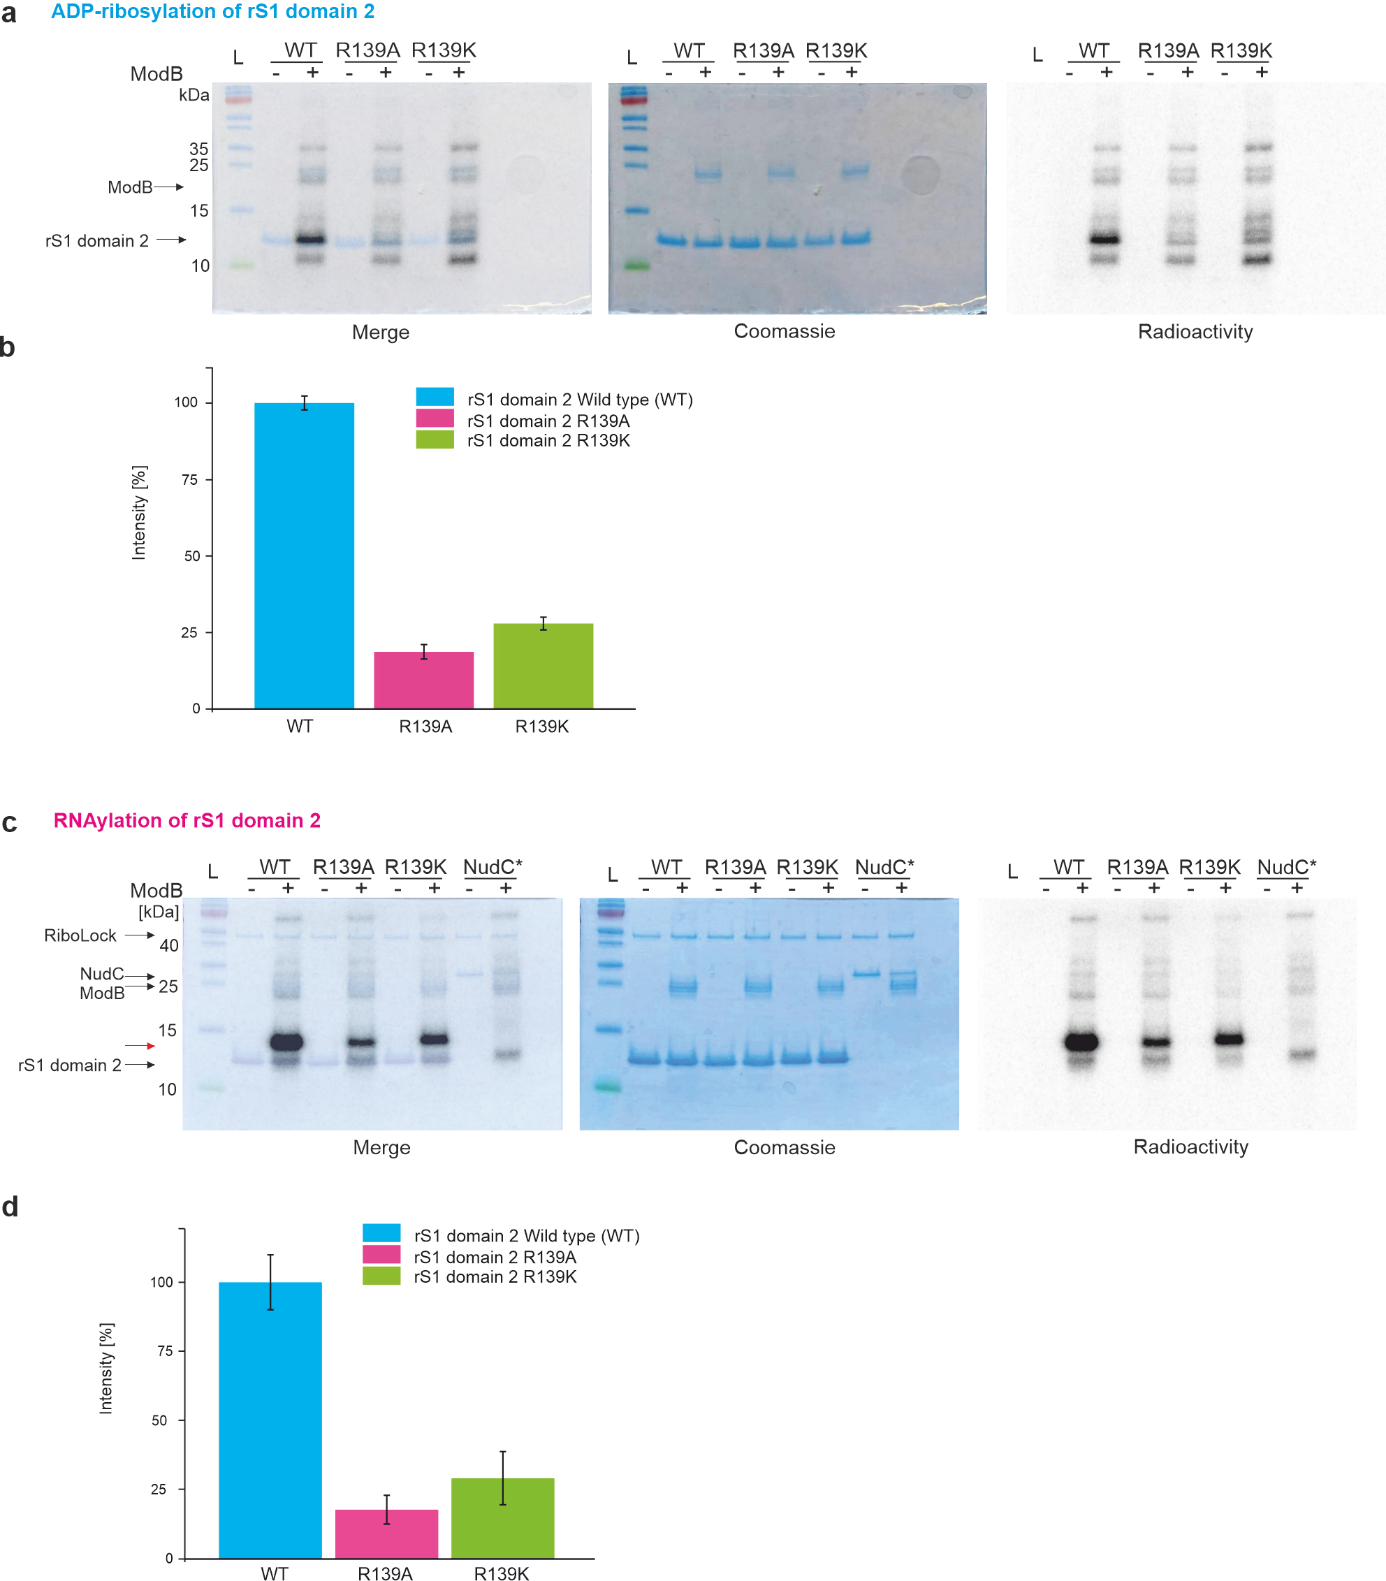


**Extended Data Fig. 9: Characterisation of the influence of R139 of rS1 domain 2 on ADP-ribosylation and RNAylation.** **a**, Analysis of the ADP-ribosylation of rS1 domain 2 and its mutants R139A and R139K by 16 % Tricine-SDS-PAGE **b**, Quantification of relative intensities of ADP-ribosylation of rS1 domain 2 and its mutants R139A and R139K. n = 2 of biologically independent replicates. **c**, Analysis of the RNAylation of rS1 domain 2 and its mutants R139A and R139K by 16 % Tricine-SDS-PAGE. Inactive version of NudC V157A, E174A, E177A, E178A (NudC*) was used. **d**, Quantification of relative intensities of RNAylation of rS1 domain 2 and its mutants R139A and R139K. n = 2 of biologically independent replicates.


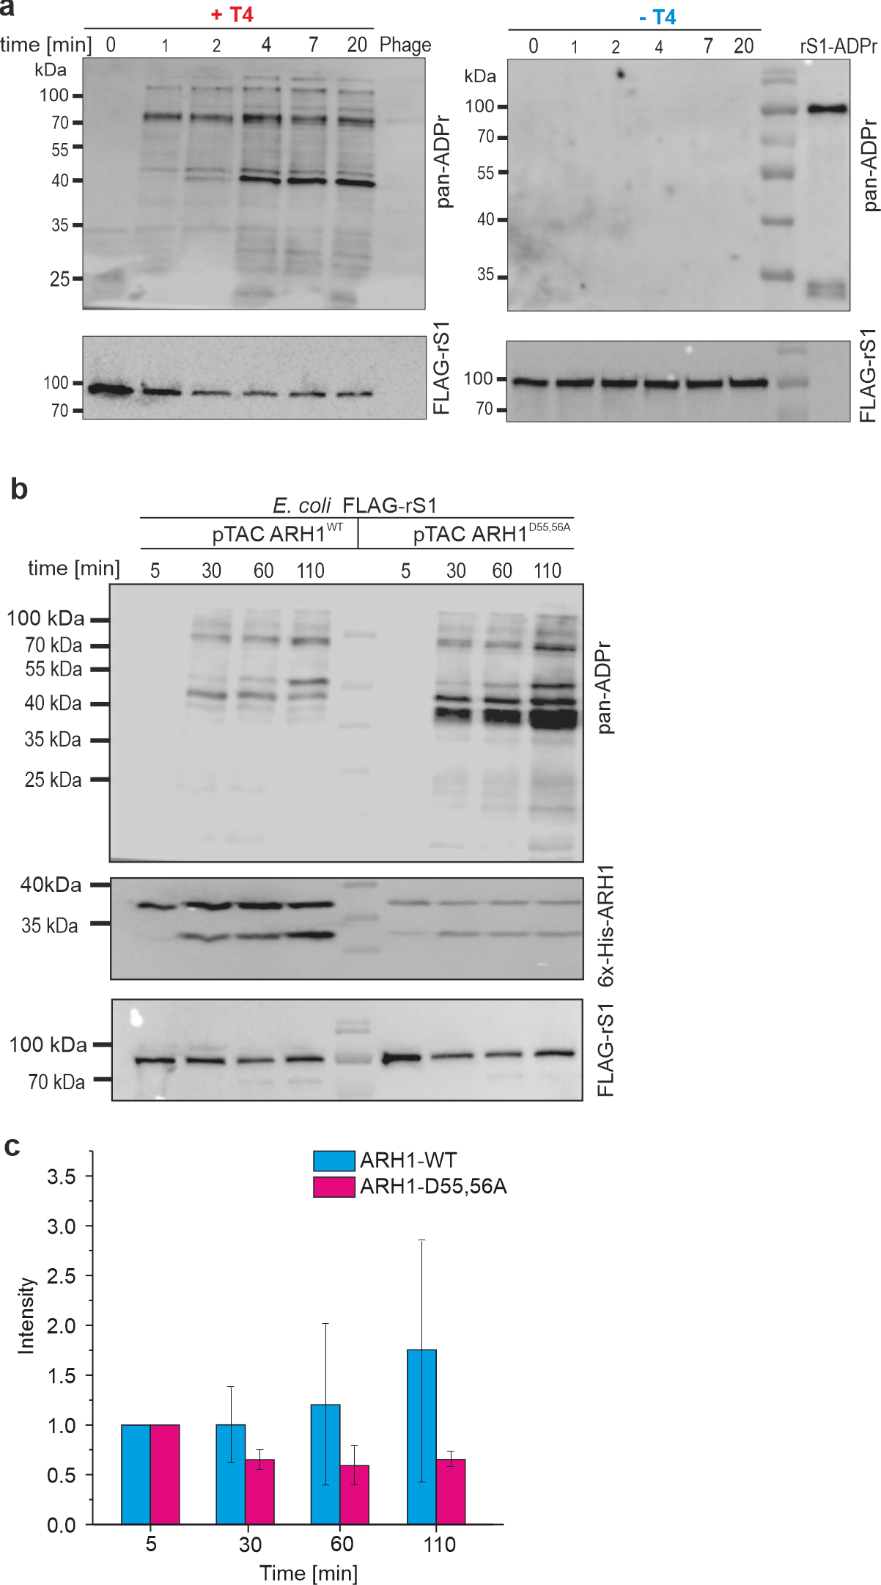


**Extended Data Fig. 10:** ***in vivo* characterisation of ADP-ribosylation and RNAylation. a**,Time course of ADP-ribosylation of T4-infected (+T4) or non-infected (-T4) *E. coli* carrying a chromosomal fusion of the Flag-tag to rS1, analysed by Western Blot. *In vitro* prepared rS1-ADPr serves as positive control, n = 4. **b,** Western blot to characterise the abundance of FLAG-rS1 during bacteriophage T4 infection in the presence of ARH1 WT and inactive ARH1 D55,56A. Comparable expression of ARH1 WT or ARH1 D55,56A was verified by Western blotting using a His-tag-specific antibody. Overexpression of ARH1 WT results in a significant decrease of the pan-ADPr signal. **c,** Quantification of FLAG-rS1 levels in T4 phage infected *E. coli* overexpressing ARH1 WT or inactive ARH1 D55,56A. FLAG-rS1 levels were determined by western blotting, shown in b.

**Extended Data Table 1: RNAs used in this study**

| **RNA** | **RNA sequence** |
| --- | --- |
| **8-mer** | ACAGUAUU |
| **Q (100-mer)** | AUCUUGAUACUACCUUUAGUUCGUUUAAACACGUUCUUGAUAGUAUCUUUUUAUUAACCCAACGCGUAAAGCGUUGAAACUUUGGGUCAAUUUGAUCAUG |

**Extended Data Tables 2: Genomic DNA sequence of ARTs, rS1 variants and ADP-ribose hydrolases.** Start codon in italic; thrombin cleavage site in bold; mutations in red and bold; restriction sites underlined

| **Gene [5’, 3’ restriction site]** | **DNA sequence** |
| --- | --- |
| **Alt [*NcoI*, *XhoI*]** | CC*ATG*GGAGAACTTATTACAGAATTATTTGACGAAGATACTACTCTTCCAATTACAAACTTATATCCAAAGAAGAAAATACCGCAAATTTTTTCAGTTCATGTTGATGATGCAATTGAACAACCAGGCTTTCGTTTATGTACCTATACATCTGGAGGTGATACTAATCGTGATTTAAAGATGGGCGATAAAATGATGCATATTGTTCCTTTTACATTAACTGCTAAAGGTTCAATTGCTAAATTAAAAGGTCTTGGTCCAAGCCCAATTAATTATATCAATTCAGTTTTTACTGTTGCAATGCAAACAATGCGCCAGTATAAAATTGATGCCTGTATGCTCCGTATTCTTAAGTCTAAAACTGCTGGCCAAGCTCGACAAATTCAAGTTATTGCTGATAGACTTATCCGTAGTCGTTCAGGTGGTAGATACGTCCTTCTTAAGGAACTCTGGGATTACGATAAAAAGTATGCATATATTCTTATACATCGCAAAAATGTATCACTAGAAGACATTCCAGGAGTTCCGGAAATTAGTACCGAGCTCTTTACTAAAGTTGAATCGAAGGTCGGTGATGTTTATATCAATAAAGATACTGGGGCTCAAGTAACTAAAAATGAGGCAATTGCAGCATCTATTGCGCAAGAAAATGATAAACGTTCTGACCAAGCTGTAATCGTTAAAGTTAAAATTTCCCGTAGAGCAATTGCGCAAAGTCAGTCATTGGAATCTTCTAGATTTGAAACACCAATGTTTCAAAAATTTGAGGCTTCAGCGGCCGAATTAAATAAACCAGCGGACGCGCCTTTAATTTCTGATTCTAATGAATTAACGGTAATTTCTACTTCAGGATTTGCACTAGAGAATGCTCTTAGCAGTGTTACAGCTGGGATGGCATTCAGAGAAGCTTCTATAATTCCTGAAGATAAAGAATCCATTATTAACGCAGAAATAAAAAATAAAGCTTTAGAAAGATTACGAAAAGAATCTATTACTTCAATAAAAACCTTAGAAACTATTGCTTCTATCGTCGATGATACTTTAGAAAAATATAAGGGTGCTTGGTTTGAAAGAAATATTAACAAACATTCGCATTTAAACCAAGATGCTGCAAATGAGTTAGTACAAAATTCTTGGAATGCAATAAAAACAAAGATTATTCGAAGAGAATTACGTGGATATGCTCTTACCGCTGGATGGTCATTACATCCTATAGTCGAAAATAAAGATTCATCTAAATACACACCAGCGCAAAAACGCGGAATTCGTGAATACGTAGGTTCAGGATATGTAGACATAAATAATGCTCTTTTGGGATTATATAATCCAGATGAGCGTACAAGTATTTTGACAGCATCTGACATAGAAAAAGCTATTGATAATTTAGATTCAGCCTTTAAAAATGGTGAACGATTACCAAAAGGTATTACTTTGTATCGTTCACAACGAATGTTACCTTCAATATACGAAGCAATGGTAAAAAATCGAGTTTTTTATTTTAGAAACTTTGTGTCAACATCATTATATCCAAATATTTTTGGTACTTGGATGACTGATTCATCTATAGGTGTTTTACCAGACGAAAAGCGTTTAAGCGTTTCTATTGATAAAACTGATGAAGGACTTGTAAATTCTAGCGATAATTTAGTTGGAATTGGATGGGTTATTACTGGGGCTGATAAGGTCAATGTTGTTTTACCCGGTGGAAGTTTAGCGCCTTCAAATGAAATGGAAGTCATTTTGCCACGTGGATTAATGGTCAAAGTTAATAAAATAACCGATGCATCTTACAATGATGGAACAGTTAAAACTAACAACAAGCTTATTCAAGCTGAAGTTATGACCACAGAAGAACTCACCGAATCGGTAATCTATGACGGAGACCATTTAATGGAAACTGGTGAATTGGTTACAATGACAGGTGATATAGAAGATAGAGTTGACTTTGCATCATTTGTTTCATCAAATGTTAAACAGAAAGTAGAATCATCTCTTGGAATTATTGCGTCTTGCATAGATATTGCAAACATGCCTTACAAGTTCGTTCAAGGA**CTGGTGCCGCGCGGCAGC**CTCGAG |
| **ModA [*NcoI*, *XhoI*]** | CC*ATG*GGAAAATACTCAGTAATGCAACTAAAAGATTTTAAAATAAAATCAATGGATGCATCGGTGCGTGCTTCTATTCGTGAAGAATTACTTTCTGAAGGGTTTAATTTATCTGAAATTGAACTTTTAATTCATTGTATTACTAATAAACCAGATGACCATTCTTGGTTAAATGAAATAATCAAATCTCGTTTGGTTCCAAACGATAAACCTCTTTGGAGAGGTGTTCCAGCTGAGACTAAACAAGTATTAAATCAAGGAATTGATATTATTACATTTGATAAAGTCGTATCAGCTTCATATGATAAAAATATAGCTCTACATTTTGCTTCTGGTTTAGAGTATAACACACAAGTTATTTTTGAATTCAAAGCTCCTATGGTATTCAATTTCCAGGAGTATGCTATAAAAGCTCTACGCTGTAAAGAATACAATCCAAACTTTAAGTTTCCGGATAGTCATCGTTATCGTAATATGGAATTAGTTTCAGATGAACAAGAAGTAATGATACCAGCTGGAAGTGTATTTAGAATTGCAGATAGATATGAGTATAAAAAGTGTTCAACATACACTATCTATACTCTTGATTTTGAAGGATTTAATCTA**CTGGTGCCGCGCGGCAGC**CTCGAG |
| **ModB [*NcoI*, *XhoI*]** | CC*ATG*GGAATTATTAATCTTGCAGATGTTGAACAGTTATCTATAAAAGCTGAAAGCGTTGATTTTCAATATGATATGTATAAAAAGGTCTGTGAAAAATTTACTGACTTTGAGCAGTCTGTTCTTTGGCAATGTATGGAAGCCAAAAAGAATGAAGCTCTTCATAAGCATTTAAATGAAATCATTAAAAAGCATTTAACTAAATCGCCTTATCAATTATATCGTGGTATATCAAAATCGACAAAAGAACTCATTAAAGATTTACAAGTTGGAGAAGTGTTTTCAACGAACAGGGTAGATTCATTTACTACTAGTTTGCATACAGCGTGTTCTTTTTCTTATGCTGAATATTTCACTGAAACAATACTTCGTTTAAAAACTGATAAAGCTTTTAATTATTCTGACCATATCAGCGATATTATACTTTCTTCTCCTAATACTGAGTTTAAGTACACGTATGAAGATACTGATGGATTAGATTCAGAGCGTACTGATAACTTAATGATGATTGTGCGTGAACAAGAATGGATGATTCCAATTGGAAAGTATAAAATAACTTCTATTTCAAAAGAAAAATTACACGATTCATTTGGAACATTTAAAGTTTATGATATTGAGGTAGTTGAA**CTGGTGCCGCGCGGCAGC**CTCGAG |
| **pET28-rS1 [*NcoI*, *XhoI*]** | CC*ATG*GGAACTGAATCTTTTGCTCAACTCTTTGAAGAGTCCTTAAAAGAAATCGAAACCCGCCCGGGTTCTATCGTTCGTGGCGTTGTTGTTGCTATCGACAAAGACGTAGTACTGGTTGACGCTGGTCTGAAATCTGAGTCCGCCATCCCGGCTGAGCAGTTCAAAAACGCCCAGGGCGAGCTGGAAATCCAGGTAGGTGACGAAGTTGACGTTGCTCTGGACGCAGTAGAAGACGGCTTCGGTGAAACTCTGCTGTCCCGTGAGAAAGCTAAACGTCACGAAGCCTGGATCACGCTGGAAAAAGCTTACGAAGATGCTGAAACTGTTACCGGTGTTATCAACGGCAAAGTTAAGGGCGGCTTCACTGTTGAGCTGAACGGTATTCGTGCGTTCCTGCCAGGTTCTCTGGTAGACGTTCGTCCGGTGCGTGACACTCTGCACCTGGAAGGCAAAGAGCTTGAATTTAAAGTAATCAAGCTGGATCAGAAGCGCAACAACGTTGTTGTTTCTCGTCGTGCCGTTATCGAATCCGAAAACAGCGCAGAGCGCGATCAGCTGCTGGAAAACCTGCAGGAAGGCATGGAAGTTAAAGGTATCGTTAAGAACCTCACTGACTACGGTGCATTCGTTGATCTGGGCGGCGTTGACGGCCTGCTGCACATCACTGACATGGCCTGGAAACGCGTTAAGCATCCGAGCGAAATCGTCAACGTGGGCGACGAAATCACTGTTAAAGTGCTGAAGTTCGACCGCGAACGTACCCGTGTATCCCTGGGCCTGAAACAGCTGGGCGAAGATCCGTGGGTAGCTATCGCTAAACGTTATCCGGAAGGTACCAAACTGACTGGTCGCGTGACCAACCTGACCGACTACGGCTGCTTCGTTGAAATCGAAGAAGGCGTTGAAGGCCTGGTACACGTTTCCGAAATGGACTGGACCAACAAAAACATCCACCCGTCCAAAGTTGTTAACGTTGGCGATGTAGTGGAAGTTATGGTTCTGGATATCGACGAAGAACGTCGTCGTATCTCCCTGGGTCTGAAACAGTGCAAAGCTAACCCGTGGCAGCAGTTCGCGGAAACCCACAACAAGGGCGACCGTGTTGAAGGTAAAATCAAGTCTATCACTGACTTCGGTATCTTCATCGGCTTGGACGGCGGCATCGACGGCCTGGTTCACCTGTCTGACATCTCCTGGAACGTTGCAGGCGAAGAAGCAGTTCGTGAATACAAAAAAGGCGACGAAATCGCTGCAGTTGTTCTGCAGGTTGACGCAGAACGTGAACGTATCTCCCTGGGCGTTAAACAGCTCGCAGAAGATCCGTTCAACAACTGGGTTGCTCTGAACAAGAAAGGCGCTATCGTAACCGGTAAAGTAACTGCAGTTGACGCTAAAGGCGCAACCGTAGAACTGGCTGACGGCGTTGAAGGTTACCTGCGTGCTTCTGAAGCATCCCGTGACCGCGTTGAAGACGCTACCCTGGTTCTGAGCGTTGGCGACGAAGTTGAAGCTAAATTCACCGGCGTTGATCGTAAAAACCGCGCAATCAGCCTGTCTGTTCGTGCGAAAGACGAAGCTGACGAGAAAGATGCAATCGCAACTGTTAACAAACAGGAAGATGCAAACTTCTCCAACAACGCAATGGCTGAAGCTTTCAAAGCAGCTAAAGGCGAG**CTGGTGCCGCGCGGCAGC**CTCGAG |
| **pTAC-rS1 [*XhoI*, *SphI*]** | ATGAAGCTTCCTCGAGAGACTGAATCTTTTGCTCAACTCTTTGAAGAGTCCTTAAAAGAAATCGAAACCCGCCCGGGTTCTATCGTTCGTGGCGTTGTTGTTGCTATCGACAAAGACGTAGTACTGGTTGACGCTGGTCTGAAATCTGAGTCCGCCATCCCGGCTGAGCAGTTCAAAAACGCCCAGGGCGAGCTGGAAATCCAGGTAGGTGACGAAGTTGACGTTGCTCTGGACGCAGTAGAAGACGGCTTCGGTGAAACTCTGCTGTCCCGTGAGAAAGCTAAACGTCACGAAGCCTGGATCACGCTGGAAAAAGCTTACGAAGATGCTGAAACTGTTACCGGTGTTATCAACGGCAAAGTTAAGGGCGGCTTCACTGTTGAGCTGAACGGTATTCGTGCGTTCCTGCCAGGTTCTCTGGTAGACGTTCGTCCGGTGCGTGACACTCTGCACCTGGAAGGCAAAGAGCTTGAATTTAAAGTAATCAAGCTGGATCAGAAGCGCAACAACGTTGTTGTTTCTCGTCGTGCCGTTATCGAATCCGAAAACAGCGCAGAGCGCGATCAGCTGCTGGAAAACCTGCAGGAAGGCATGGAAGTTAAAGGTATCGTTAAGAACCTCACTGACTACGGTGCATTCGTTGATCTGGGCGGCGTTGACGGCCTGCTGCACATCACTGACATGGCCTGGAAACGCGTTAAGCATCCGAGCGAAATCGTCAACGTGGGCGACGAAATCACTGTTAAAGTGCTGAAGTTCGACCGCGAACGTACCCGTGTATCCCTGGGCCTGAAACAGCTGGGCGAAGATCCGTGGGTAGCTATCGCTAAACGTTATCCGGAAGGTACCAAACTGACTGGTCGCGTGACCAACCTGACCGACTACGGCTGCTTCGTTGAAATCGAAGAAGGCGTTGAAGGCCTGGTACACGTTTCCGAAATGGACTGGACCAACAAAAACATCCACCCGTCCAAAGTTGTTAACGTTGGCGATGTAGTGGAAGTTATGGTTCTGGATATCGACGAAGAACGTCGTCGTATCTCCCTGGGTCTGAAACAGTGCAAAGCTAACCCGTGGCAGCAGTTCGCGGAAACCCACAACAAGGGCGACCGTGTTGAAGGTAAAATCAAGTCTATCACTGACTTCGGTATCTTCATCGGCTTGGACGGCGGCATCGACGGCCTGGTTCACCTGTCTGACATCTCCTGGAACGTTGCAGGCGAAGAAGCAGTTCGTGAATACAAAAAAGGCGACGAAATCGCTGCAGTTGTTCTGCAGGTTGACGCAGAACGTGAACGTATCTCCCTGGGCGTTAAACAGCTCGCAGAAGATCCGTTCAACAACTGGGTTGCTCTGAACAAGAAAGGCGCTATCGTAACCGGTAAAGTAACTGCAGTTGACGCTAAAGGCGCAACCGTAGAACTGGCTGACGGCGTTGAAGGTTACCTGCGTGCTTCTGAAGCATCCCGTGACCGCGTTGAAGACGCTACCCTGGTTCTGAGCGTTGGCGACGAAGTTGAAGCTAAATTCACCGGCGTTGATCGTAAAAACCGCGCAATCAGCCTGTCTGTTCGTGCGAAAGACGAAGCTGACGAGAAAGATGCAATCGCAACTGTTAACAAACAGGAAGATGCAAACTTCTCCAACAACGCAATGGCTGAAGCTTTCAAAGCAGCTAAAGGCGAGTGCATGCACGTAGAG |
| **S1 D1 [*NcoI*, *XhoI*]** | CC*ATG*GAGTCCTTAAAAGAAATCGAAACCCGCCCGGGTTCTATCGTTCGTGGCGTTGTTGTTGCTATCGACAAAGACGTAGTACTGGTTGACGCTGGTCTGAAATCTGAGTCCGCCATCCCGGCTGAGCAGTTCAAAAACGCCCAGGGCGAGCTGGAAATCCAGGTAGGTGACGAAGTTGACGTTGCTCTGGACGCAGTAGAAGACGGCTTCGGTGAAACTCTGCTGTCCCGTGAGAAAGCTAAACGTCACGAAGCC**CTGGTGCCGCGCGGCAGC**CTCGAG |
| **S1 D2 [*NcoI*, *XhoI*]** | CC*ATG*GCCTGGATCACGCTGGAAAAAGCTTACGAAGATGCTGAAACTGTTACCGGTGTTATCAACGGCAAAGTTAAGGGCGGCTTCACTGTTGAGCTGAACGGTATTCGTGCGTTCCTGCCAGGTTCTCTGGTAGACGTTCGTCCGGTGCGTGACACTCTGCACCTGGAAGGCAAAGAGCTTGAATTTAAAGTAATCAAGCTGGATCAGAAGCGCAACAACGTTGTTGTTTCTCGTCGTGCCGTTATCGAATCCGAAAACAGCGCAGAG**CTGGTGCCGCGCGGCAGC**CTCGAG |
| **S1 D2 R139A [*NcoI*, *XhoI*]** | CC*ATG*GCCTGGATCACGCTGGAAAAAGCTTACGAAGATGCTGAAACTGTTACCGGTGTTATCAACGGCAAAGTTAAGGGCGGCTTCACTGTTGAGCTGAACGGTATTCGTGCGTTCCTGCCAGGTTCTCTGGTAGACGTTGCCCCGGTGCGTGACACTCTGCACCTGGAAGGCAAAGAGCTTGAATTTAAAGTAATCAAGCTGGATCAGAAGCGCAACAACGTTGTTGTTTCTCGTCGTGCCGTTATCGAATCCGAAAACAGCGCAGAG**CTGGTGCCGCGCGGCAGC**CTCGAG |
| **S1 D2 R139K [*NcoI*, *XhoI*]** | CC*ATG*GCCTGGATCACGCTGGAAAAAGCTTACGAAGATGCTGAAACTGTTACCGGTGTTATCAACGGCAAAGTTAAGGGCGGCTTCACTGTTGAGCTGAACGGTATTCGTGCGTTCCTGCCAGGTTCTCTGGTAGACGTTAAACCGGTGCGTGACACTCTGCACCTGGAAGGCAAAGAGCTTGAATTTAAAGTAATCAAGCTGGATCAGAAGCGCAACAACGTTGTTGTTTCTCGTCGTGCCGTTATCGAATCCGAAAACAGCGCAGAG**CTGGTGCCGCGCGGCAGC**CTCGAG |
| **S1 D3 [*NcoI*, *XhoI*]** | CC*ATG*GCCCGCGATCAGCTGCTGGAAAACCTGCAGGAAGGCATGGAAGTTAAAGGTATCGTTAAGAACCTCACTGACTACGGTGCATTCGTTGATCTGGGCGGCGTTGACGGCCTGCTGCACATCACTGACATGGCCTGGAAACGCGTTAAGCATCCGAGCGAAATCGTCAACGTGGGCGACGAAATCACTGTTAAAGTGCTGAAGTTCGACCGCGAACGTACCCGTGTATCCCTGGGCCTGAAACAGCTGGGCGAAGATCCG**CTGGTGCCGCGCGGCAGC**CTCGAG |
| **S1 D4 [*NcoI*, *XhoI*]** | CC*ATG*GCCTGGGTAGCTATCGCTAAACGTTATCCGGAAGGTACCAAACTGACTGGTCGCGTGACCAACCTGACCGACTACGGCTGCTTCGTTGAAATCGAAGAAGGCGTTGAAGGCCTGGTACACGTTTCCGAAATGGACTGGACCAACAAAAACATCCACCCGTCCAAAGTTGTTAACGTTGGCGATGTAGTGGAAGTTATGGTTCTGGATATCGACGAAGAACGTCGTCGTATCTCCCTGGGTCTGAAACAGTGCAAAGCTAACCCG**CTGGTGCCGCGCGGCAGC**CTCGAG |
| **S1 D5 [*NcoI*, *XhoI*]** | CC*ATG*GCCTGGCAGCAGTTCGCGGAAACCCACAACAAGGGCGACCGTGTTGAAGGTAAAATCAAGTCTATCACTGACTTCGGTATCTTCATCGGCTTGGACGGCGGCATCGACGGCCTGGTTCACCTGTCTGACATCTCCTGGAACGTTGCAGGCGAAGAAGCAGTTCGTGAATACAAAAAAGGCGACGAAATCGCTGCAGTTGTTCTGCAGGTTGACGCAGAACGTGAACGTATCTCCCTGGGCGTTAAACAGCTCGCAGAAGATCCG**CTGGTGCCGCGCGGCAGC**CTCGAG |
| **S1 D6 [*NcoI*, *XhoI*]** | CC*ATG*GCCTTCAACAACTGGGTTGCTCTGAACAAGAAAGGCGCTATCGTAACCGGTAAAGTAACTGCAGTTGACGCTAAAGGCGCAACCGTAGAACTGGCTGACGGCGTTGAAGGTTACCTGCGTGCTTCTGAAGCATCCCGTGACCGCGTTGAAGACGCTACCCTGGTTCTGAGCGTTGGCGACGAAGTTGAAGCTAAATTCACCGGCGTTGATCGTAAAAACCGCGCAATCAGCCTGTCTGTTCGTGCGAAAGACGAAGCTGACGAGAAA**CTGGTGCCGCGCGGCAGC**CTCGAG |
| **S1 domain of PNPase [*NcoI*, *XhoI*]** | CC*ATG*GCAGAAATCGAAGTGGGCCGCGTCTACACTGGTAAAGTGACCCGTATCGTTGACTTTGGCGCATTTGTTGCCATCGGCGGCGGTAAAGAAGGTCTGGTCCACATCTCTCAAATCGCTGACAAACGCGTTGAGAAAGTGACCGATTACCTGCAGATGGGTCAGGAAGTACCGGTGAAAGTTCTGGAAGTTGATCGCCAGGGCCGTATCCGTCTGAGCATTAAAGAAGCGACTGAGCAGTCTCAACCTGCTGCA**CTGGTGCCGCGCGGCAGC**CTCGAG |
| **pET28 ARH1 [*NcoI*, *XhoI*]** | CC*ATG*GAAAAATACGTCGCCGCGATGGTTTTGTCAGCTGCTGGCGATGCTTTGGGATATTATAATGGAAAGTGGGAATTTCTTCAGGACGGGGAGAAAATTCATCGTCAACTGGCTCAATTAGGGGGGCTGGATGCTCTGGACGTTGGCCGTTGGCGTGTGTCTGATGATACTGTCATGCACTTGGCAACAGCCGAGGCTTTGGTCGAGGCCGGAAAGGCTCCAAAACTGACTCAGCTTTATTATTTGTTAGCCAAGCACTATCAGGATTGCATGGAAGATATGGACGGTCGCGCACCCGGGGGTGCGTCTGTACACAACGCGATGCAGCTTAAACCTGGGAAACCGAATGGCTGGCGTATCCCATTTAACTCGCATGAAGGAGGGTGTGGCGCGGCGATGCGCGCGATGTGTATCGGTTTGCGTTTTCCGCATCACTCTCAATTAGACACACTGATCCAAGTATCGATCGAGTCAGGACGTATGACCCATCATCACCCGACAGGGTACCTTGGCGCACTTGCGTCCGCCTTATTCACGGCCTATGCGGTAAATAGCCGCCCTCCATTGCAGTGGGGTAAGGGACTTATGGAGCTTTTGCCAGAGGCTAAAAAATACATTGTCCAATCCGGGTACTTTGTGGAAGAAAATTTACAGCATTGGTCTTATTTTCAAACGAAGTGGGAAAACTATCTTAAACTGCGTGGAATCTTGGACGGCGAGAGTGCTCCAACATTCCCTGAATCTTTTGGCGTTAAAGAGCGCGACCAGTTCTACACTTCGTTGTCATATAGTGGCTGGGGCGGTTCATCTGGGCATGATGCCCCCATGATCGCGTATGACGCGGTGCTGGCGGCGGGAGACTCCTGGAAAGAGCTTGCGCACCGCGCCTTCTTTCACGGAGGTGACTCGGATTCGACCGCAGCCATTGCTGGATGTTGGTGGGGCGTCATGTACGGATTTAAGGGCGTCAGCCCCAGCAACTACGAAAAATTAGAGTATCGCAATCGCCTTGAGGAAACAGCTCGCGCACTTTACTCGCTGGGTAGTAAAGAAGACACTGTTATCTCGCTG**CTGGTGCCGCGCGGCAGC**CTCGAG |
| **pTAC ARH1 [*XhoI*, *SphI*]** | *ATG*AAGCTTCCTCGAGAAAAATACGTCGCCGCGATGGTTTTGTCAGCTGCTGGCGATGCTTTGGGATATTATAATGGAAAGTGGGAATTTCTTCAGGACGGGGAGAAAATTCATCGTCAACTGGCTCAATTAGGGGGGCTGGATGCTCTGGACGTTGGCCGTTGGCGTGTGTCTGATGATACTGTCATGCACTTGGCAACAGCCGAGGCTTTGGTCGAGGCCGGAAAGGCTCCAAAACTGACTCAGCTTTATTATTTGTTAGCCAAGCACTATCAGGATTGCATGGAAGATATGGACGGTCGCGCACCCGGGGGTGCGTCTGTACACAACGCGATGCAGCTTAAACCTGGGAAACCGAATGGCTGGCGTATCCCATTTAACTCGCATGAAGGAGGGTGTGGCGCGGCGATGCGCGCGATGTGTATCGGTTTGCGTTTTCCGCATCACTCTCAATTAGACACACTGATCCAAGTATCGATCGAGTCAGGACGTATGACCCATCATCACCCGACAGGGTACCTTGGCGCACTTGCGTCCGCCTTATTCACGGCCTATGCGGTAAATAGCCGCCCTCCATTGCAGTGGGGTAAGGGACTTATGGAGCTTTTGCCAGAGGCTAAAAAATACATTGTCCAATCCGGGTACTTTGTGGAAGAAAATTTACAGCATTGGTCTTATTTTCAAACGAAGTGGGAAAACTATCTTAAACTGCGTGGAATCTTGGACGGCGAGAGTGCTCCAACATTCCCTGAATCTTTTGGCGTTAAAGAGCGCGACCAGTTCTACACTTCGTTGTCATATAGTGGCTGGGGCGGTTCATCTGGGCATGATGCCCCCATGATCGCGTATGACGCGGTGCTGGCGGCGGGAGACTCCTGGAAAGAGCTTGCGCACCGCGCCTTCTTTCACGGAGGTGACTCGGATTCGACCGCAGCCATTGCTGGATGTTGGTGGGGCGTCATGTACGGATTTAAGGGCGTCAGCCCCAGCAACTACGAAAAATTAGAGTATCGCAATCGCCTTGAGGAAACAGCTCGCGCACTTTACTCGCTGGGTAGTAAAGAAGACACTGTTATCTCGCTGCTGGTAGTAAAGAAGACACTGTTATCTCGCTG**CTGGTGCCGCGCGGCAGC**TGCATGC |
| **pET ARH1 D55,56A [*NcoI*, *XhoI*]** | CC*ATG*GAAAAATACGTCGCCGCGATGGTTTTGTCAGCTGCTGGCGATGCTTTGGGATATTATAATGGAAAGTGGGAATTTCTTCAGGACGGGGAGAAAATTCATCGTCAACTGGCTCAATTAGGGGGGCTGGATGCTCTGGACGTTGGCCGTTGGCGTGTGTCTGCGGCGACTGTCATGCACTTGGCAACAGCCGAGGCTTTGGTCGAGGCCGGAAAGGCTCCAAAACTGACTCAGCTTTATTATTTGTTAGCCAAGCACTATCAGGATTGCATGGAAGATATGGACGGTCGCGCACCCGGGGGTGCGTCTGTACACAACGCGATGCAGCTTAAACCTGGGAAACCGAATGGCTGGCGTATCCCATTTAACTCGCATGAAGGAGGGTGTGGCGCGGCGATGCGCGCGATGTGTATCGGTTTGCGTTTTCCGCATCACTCTCAATTAGACACACTGATCCAAGTATCGATCGAGTCAGGACGTATGACCCATCATCACCCGACAGGGTACCTTGGCGCACTTGCGTCCGCCTTATTCACGGCCTATGCGGTAAATAGCCGCCCTCCATTGCAGTGGGGTAAGGGACTTATGGAGCTTTTGCCAGAGGCTAAAAAATACATTGTCCAATCCGGGTACTTTGTGGAAGAAAATTTACAGCATTGGTCTTATTTTCAAACGAAGTGGGAAAACTATCTTAAACTGCGTGGAATCTTGGACGGCGAGAGTGCTCCAACATTCCCTGAATCTTTTGGCGTTAAAGAGCGCGACCAGTTCTACACTTCGTTGTCATATAGTGGCTGGGGCGGTTCATCTGGGCATGATGCCCCCATGATCGCGTATGACGCGGTGCTGGCGGCGGGAGACTCCTGGAAAGAGCTTGCGCACCGCGCCTTCTTTCACGGAGGTGACTCGGATTCGACCGCAGCCATTGCTGGATGTTGGTGGGGCGTCATGTACGGATTTAAGGGCGTCAGCCCCAGCAACTACGAAAAATTAGAGTATCGCAATCGCCTTGAGGAAACAGCTCGCGCACTTTACTCGCTGGGTAGTAAAGAAGACACTGTTATCTCGCTG**CTGGTGCCGCGCGGCAGC**CTCGAG |
| **pTAC ARH1 D55,56A [*XhoI*, *SphI*]** | ATGAAGCTTCCTCGAGAAAAATACGTCGCCGCGATGGTTTTGTCAGCTGCTGGCGATGCTTTGGGATATTATAATGGAAAGTGGGAATTTCTTCAGGACGGGGAGAAAATTCATCGTCAACTGGCTCAATTAGGGGGGCTGGATGCTCTGGACGTTGGCCGTTGGCGTGTGTCTGCGGCGACTGTCATGCACTTGGCAACAGCCGAGGCTTTGGTCGAGGCCGGAAAGGCTCCAAAACTGACTCAGCTTTATTATTTGTTAGCCAAGCACTATCAGGATTGCATGGAAGATATGGACGGTCGCGCACCCGGGGGTGCGTCTGTACACAACGCGATGCAGCTTAAACCTGGGAAACCGAATGGCTGGCGTATCCCATTTAACTCGCATGAAGGAGGGTGTGGCGCGGCGATGCGCGCGATGTGTATCGGTTTGCGTTTTCCGCATCACTCTCAATTAGACACACTGATCCAAGTATCGATCGAGTCAGGACGTATGACCCATCATCACCCGACAGGGTACCTTGGCGCACTTGCGTCCGCCTTATTCACGGCCTATGCGGTAAATAGCCGCCCTCCATTGCAGTGGGGTAAGGGACTTATGGAGCTTTTGCCAGAGGCTAAAAAATACATTGTCCAATCCGGGTACTTTGTGGAAGAAAATTTACAGCATTGGTCTTATTTTCAAACGAAGTGGGAAAACTATCTTAAACTGCGTGGAATCTTGGACGGCGAGAGTGCTCCAACATTCCCTGAATCTTTTGGCGTTAAAGAGCGCGACCAGTTCTACACTTCGTTGTCATATAGTGGCTGGGGCGGTTCATCTGGGCATGATGCCCCCATGATCGCGTATGACGCGGTGCTGGCGGCGGGAGACTCCTGGAAAGAGCTTGCGCACCGCGCCTTCTTTCACGGAGGTGACTCGGATTCGACCGCAGCCATTGCTGGATGTTGGTGGGGCGTCATGTACGGATTTAAGGGCGTCAGCCCCAGCAACTACGAAAAATTAGAGTATCGCAATCGCCTTGAGGAAACAGCTCGCGCACTTTACTCGCTGGGTAGTAAAGAAGACACTGTTATCTCGCTG**CTGGTGCCGCGCGGCAGC**TGCATGC |

**Extended Data tables 3: Primers used in this study.** Corresponding restriction site in bold, underlined; mutation in bold and italic

| **Primer** | **Sequence (5’ to 3’)** |
| --- | --- |
| Fwd Alt NcoI | ATCGAC**CCATGG**GAGAACTTATTACAGAATTATTTGACG |
| Rev Alt XhoI | ATTCGA**CTCGAG**GCTGCCGCGCGGCACCAGTCCTTGAACGAACTTGTAAGGCATG |
| Fwd ModA NcoI | ATCGA**CCATGG**GAAAATACTCAGTAATGCAACTAAAAG |
| Rev ModA XhoI | ATCGTA**CTCGAG**GCTGCCGCGCGGCACCAGTAGATTAAATCCTTCAAAATCAAG |
| Fwd ModB NcoI | ATCGAC**CCATGG**GAATTATTAATCTTGCAGATGTTG |
| Rev ModB XhoI | ACTTAG**CTCGAG**GCTGCCGCGCGGCACCAGTTCAACTACCTCAATATCATAAAC |
| Fwd rS1 NcoI | ATCGAC**CCATGG**GAACTGAATCTTTTGCTCAACTCTTTGAAGAGTCC |
| Rev rS1 XhoI | ATTCGA**CTCGAG**GCTGCCGCGCGGCACCAGCTCGCCTTTAGCTGCTTTG |
| Fwd rS1-pTAC XhoI | ATG AAG CTT C**CT CGA GAG**ACTGAATCTTTTGCTCAACTCTTTGAAGAGTCC |
| Rev rS1-pTAC SphI | CTCTACGT**GCATGC**ACTCGCCTTTAGCTGCTTTGAAAGCTTCAGCC |
| Fwd NcoI rS1 D1 | ATCGAC**CCATGG**AGTCCTTAAAAGAAATCGAAACCCGCCCGGG |
| Rev XhoI rS1 D1 | TGGTG**CTCGAG**GCTGCCGCGCGGCACCAGGGCTTCGTGACGTTTAGCTTTCTCACGGG |
| Fwd NcoI rS1 D2 | ATCGAC**CCATGG**CCTGGATCACGCTGGAAAAAGCTTACGAAGATGCTGAAAC |
| Rev XhoI rS1 D2 | GGTG**CTCGAG**GCTGCCGCGCGGCACCAGCTCTGCGCTGTTTTCGGATTCGATAACGGCAC |
| Fwd NcoI rS1 D3 | ATCGAC**CCATGG**CCCGCGATCAGCTGCTGGAAAACCTGCAGGAAGG |
| Rev XhoI rS1 D3 | TGGTG**CTCGAG**GCTGCCGCGCGGCACCAGCGGATCTTCGCCCAGCTGTTTCAGGCCCAGG |
| Fwd NcoI rS1 D4 | ATCGAC**CCATGG**CCTGGGTAGCTATCGCTAAACGTTATCCGGAAGG |
| Rev XhoI rS1 D4 | TGGTG**CTCGAG**GCTGCCGCGCGGCACCAGCGGGTTAGCTTTGCACTGTTTCAGACCCAGGGAG |
| Fwd NcoI rS1 D5 | ATCGAC**CCATGG**CCTGGCAGCAGTTCGCGGAAACCCACAACAAGGGCGACCGTGTTG |
| Rev XhoI S1 D5 | TGGTG**CTCGAG**GCTGCCGCGCGGCACCAGCGGATCTTCTGCGAGCTGTTTAACGCCCAGGGAGATACG |
| Fwd NcoI rS1 D6 | ATCGAC**CCATGG**CCTTCAACAACTGGGTTGCTCTGAACAAGAAAGGCGCTATCG |
| Rev XhoI rS1 D6 | TGGTG**CTCGAG**GCTGCCGCGCGGCACCAGTTTCTCGTCAGCTTCGTCTTTCGCACGAACAGACAGG |
| Fwd NcoI PNPase rS1 binding | ATCGAC**CCATGG**CAGAAATCGAAGTGGGCCGCGTCTACACTGGTAAAGTGACCCG |
| Rev XhoI PNPase rS1 binding | TGGTG**CTCGAG**GCTGCCGCGCGGCACCAGTGCAGCAGGTTGAGACTGCTCAGTCGCTTC |
| Fwd ARH1 NcoI | TGCAG**CCATGG**AAAAATACGTCGCCGCGATG |
| Rev ARH1 XhoI | GTGGTG**CTCGAG**GCTGCCGCGCGGCACCAG |
| Fwd XhoI pTAC ARH1 | ATG AAG CTT C**CT CGA G**AA AAA TAC GTC GCC GCG ATG GTT TTG TCA GCT GCT GGC |
| Rev SphI pTAC ARH1 | CTACGT**GCATGC**AGCTGCCGCGCGGCACCAGCAGCGAGATAACAGTGTCTTCTTTACTACC |
| Fwd rS1 R139A | CTGGTAGACGTT***GCC***CCGGTGCGTGACACTC |
| Fwd rS1 R139K | CTGGTAGACGTT***AAA***CCGGTGCGTGACACTC |
| Rev rS1 R139 | AGAACCTGGCAGGAACGCACGAATACCG |
| Fwd ARH1 D55,56A | 5’-P-GGCCGTTGGCGTGTGTCT***GCGGCG***ACTGTCATGCACTTGGC |
| Rev ARH1 D55,56A | 5’-P-AACGTCCAGAGCATCCAGCCCCCCTAA |

**Extended Data table 4: Strains and plasmids used in this study**

| **Name** | **Description** | **Reference or resource** |
| --- | --- | --- |
| ***E. coli* strain B** | *E. coli* strain applied for bacteriophage T4 infection | DMSZ |
| ***E. coli* strain B pTAC rS1** | *E. coli* strain B expressing His-tagged rS1 under control of *E. coli* RNA polymerase promoter | This study |
| ***E. coli* strain B pATC ARH1** | *E. coli* strain B expressing His-tagged ARH1 under control of *E. coli* RNA polymerase promoter | This study |
| ***E. coli* strain B pTAC ARH1 D55,56A** | *E. coli* strain B expressing His-tagged ARH1 inactive mutant under control of *E. coli* RNA polymerase promoter | This study |
| ***E. coli* strain FLAG-S1 (Ced 64)** | *E. coli* strain with endogenous expression of rS1 with a 3xFLAG at C-terminus | Strain was a kind gift from Prof. Dr. Gerhart Wagner 3 |
| ***E. coli* BL21 (DE3) pET16 RNase E (1-529)** | *E. coli* strain expressing His-tagged catalytic domain of RNase E (1-529) | Plasmid was a kind gift from Prof. Dr. Ben Luisi 4 |
| ***E. coli* BL21 (DE3) pET 28 NudC V157A, E174A, E177A, E178A** | *E. coli* strain expressing His-tagged inactive Mutant of NudC | 5 |
| ***E. coli* BL21 (DE3) pET 28 rS1** | *E. coli* strain expressing His-tagged rS1 | This study |
| ***E. coli* BL21 (DE3) pET 28 rS1 R139K** | *E. coli* strain expressing His-tagged rS1 R139K variant | This study |
| ***E. coli* BL21 (DE3) pET 28 rS1 R139A** | *E. coli* strain expressing His-tagged rS1 R139A variant | This study |
| ***E. coli* BL21 (DE3) pET 28 rS1 D1** | *E. coli* strain expressing His-tagged rS1 D1 | This study |
| ***E. coli* BL21 (DE3) pET 28 rS1 D2** | *E. coli* strain expressing His-tagged rS1 D2 | This study |
| ***E. coli* BL21 (DE3) pET 28 rS1 D2 R139K** | *E. coli* strain expressing His-tagged rS1 D2 R139K | This study |
| ***E. coli* BL21 (DE3) pET 28 rS1 D2 R139A** | *E. coli* strain expressing His-tagged rS1 D2 R139A | This study |
| ***E. coli* BL21 (DE3) pET 28 rS1 D3** | *E. coli* strain expressing His-tagged rS1 D3 | This study |
| ***E. coli* BL21 (DE3) pET 28 rS1 D4** | *E. coli* strain expressing His-tagged rS1 D4 | This study |
| ***E. coli* BL21 (DE3) pET 28 rS1 D5** | *E. coli* strain expressing His-tagged rS1 D5 | This study |
| ***E. coli* BL21 (DE3) pET 28 rS1 D6** | *E. coli* strain expressing His-tagged rS1 D6 | This study |
| ***E. coli* BL21 (DE3) pET 28 Alt** | *E. coli* strain expressing His-tagged Alt | This study |
| ***E. coli* BL21 (DE3) pET 28 ModA** | *E. coli* strain expressing His-tagged ModA | This study |
| ***E. coli* BL21 (DE3) pET 28 ModB** | *E. coli* strain expressing His-tagged ModB | This study |
| ***E. coli* BL21 (DE3) pET 28 NudC** | *E. coli* strain expressing His-tagged NudC | 5 |
| ***E. coli* BL21 (DE3) pET 28 PNPase S1 domain** | *E. coli* strain expressing His-tagged PNPase S1 domain | This study |
| ***E. coli* BL21 (DE3) pET 28 ARH1** | *E. coli* strain expressing His-tagged ARH1 | This study |
| ***E. coli* BL21 (DE3) pET 28 ARH1 D55A D56A** | *E. coli* strain expressing His-tagged ARH1 D55A D56A | This study |

References

1 Qureshi, N. S., Bains, J. K., Sreeramulu, S., Schwalbe, H. & Fürtig, B. Conformational switch in the ribosomal protein S1 guides unfolding of structured RNAs for translation initiation. *Nucleic Acids Res* **46**, 10917-10929, doi:10.1093/nar/gky746 (2018).

2 Di Tommaso, P. *et al.* T-Coffee: a web server for the multiple sequence alignment of protein and RNA sequences using structural information and homology extension. *Nucleic Acids Res* **39**, W13-17, doi:10.1093/nar/gkr245 (2011).

3 Romilly, C., Deindl, S. & Wagner, E. G. H. The ribosomal protein S1-dependent standby site in tisB mRNA consists of a single-stranded region and a 5' structure element. *Proc Natl Acad Sci U S A* **116**, 15901-15906, doi:10.1073/pnas.1904309116 (2019).

4 Callaghan, A. J. *et al.* Structure of Escherichia coli RNase E catalytic domain and implications for RNA turnover. *Nature* **437**, 1187-1191, doi:10.1038/nature04084 (2005).

5 Cahova, H., Winz, M. L., Höfer, K., Nübel, G. & Jäschke, A. NAD captureSeq indicates NAD as a bacterial cap for a subset of regulatory RNAs. *Nature* **519**, 374-377, doi:10.1038/nature14020 (2015).
